# Supplementary material
Source: Springer Nature journal article supplement (https://www.springermedizin.de/resource/supplementary/13054_2010_8390_MOESM1_ESM.pdf/9731858)

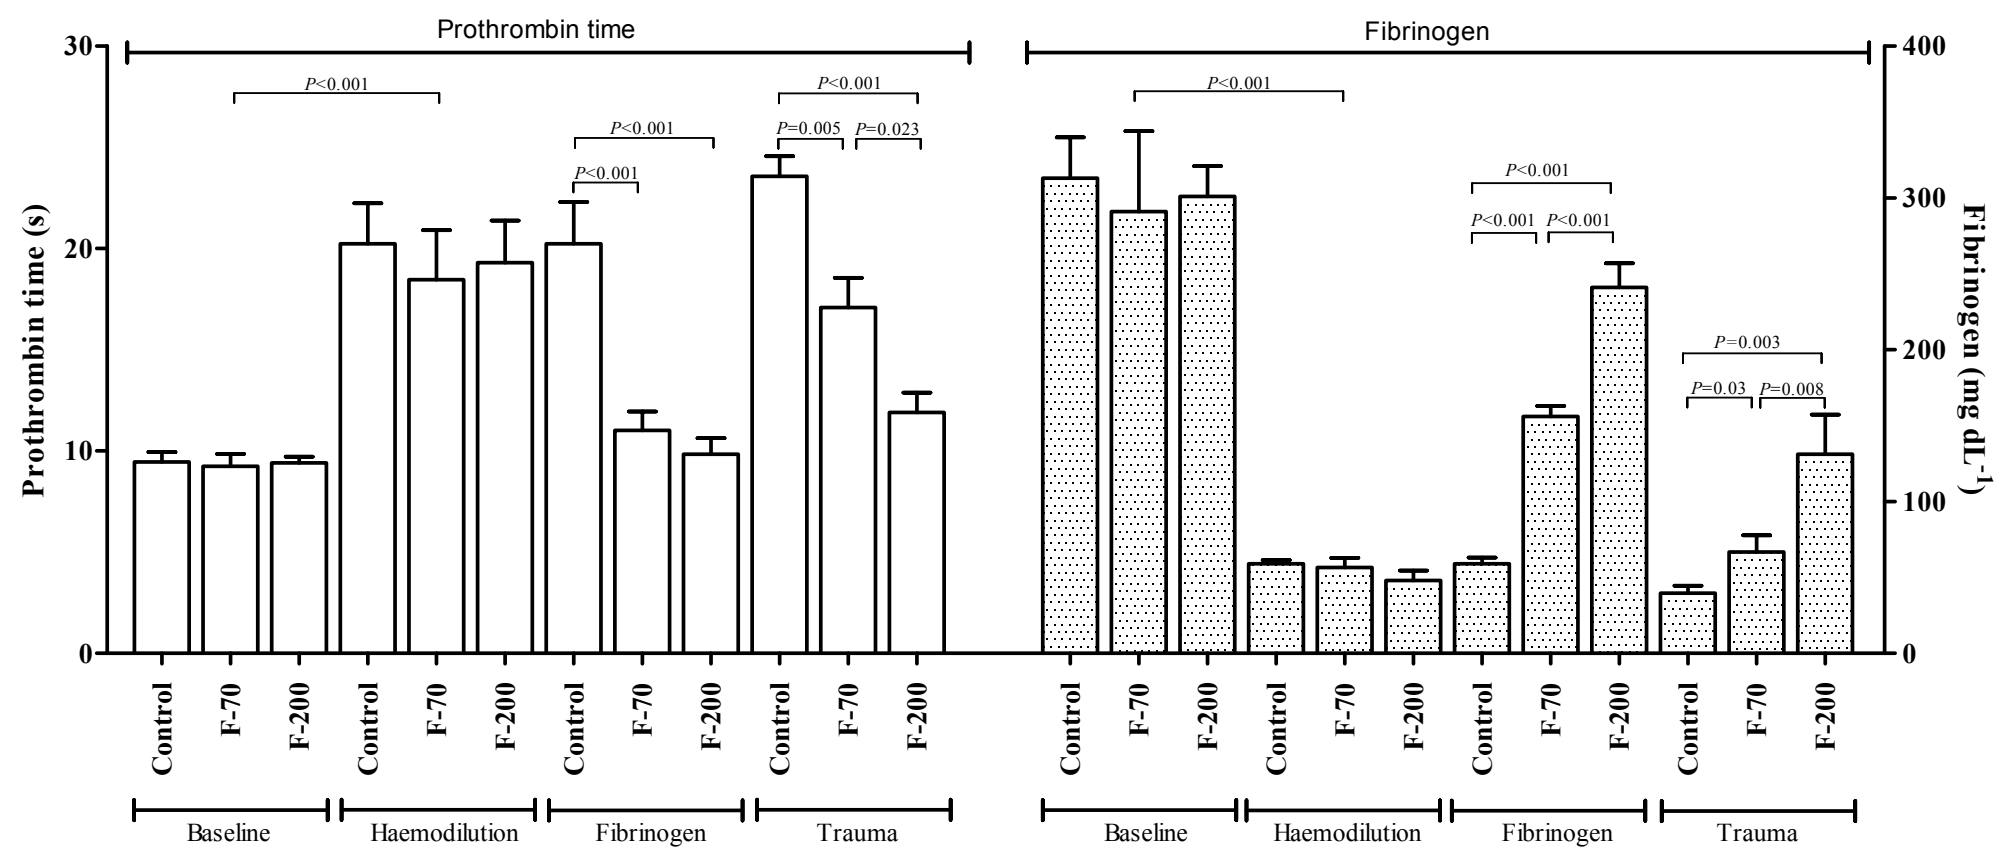

Supplement: MOESM1 [file 9731858]
